# Supplementary material for: TEMPO-Cellulose Nanocrystal-Capped Gold Nanoparticles for Colorimetric Detection of Pathogenic DNA
Source: PubMed Central journal article supplement — ACS Omega. 2021 Mar 22;6(19):12424–31. doi: 10.1021/acsomega.1c00359 (PMC8154114; doi:10.1021/acsomega.1c00359), 2021-03-22
Supplement: ao1c00359_si_001.pdf [file ao1c00359_si_001.pdf]

## **Supplementary Information**

### **TEMPO-CNC-capped gold nanoparticles for colorimetric detection of pathogenic DNA**

Keya Ganguly, Dinesh K. Patel, Sayan Deb Dutta, and Ki-Taek Lim\*

*Department of Biosystems Engineering, Institute of Forest Sciences, Kangwon National University, Chuncheon-24341, Republic of Korea.*

\*Corresponding author: [ktlim@kangwon.ac.kr](mailto:ktlim@kangwon.ac.kr) (Professor, Kangwon National University)

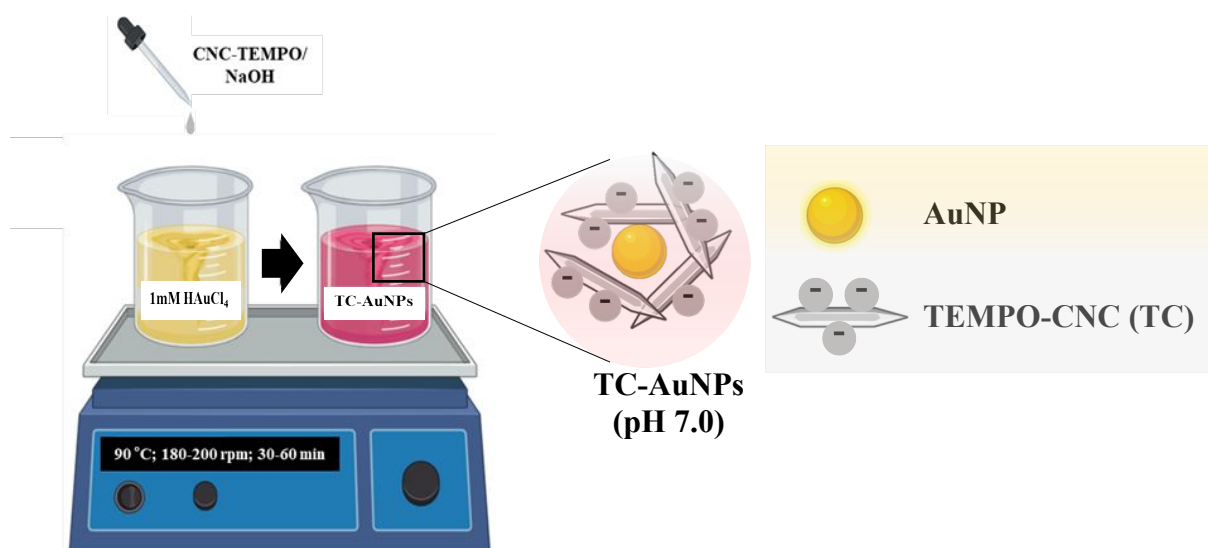

**Figure S1.** Schematic illustration of the synthesis of TC-AuNPs.

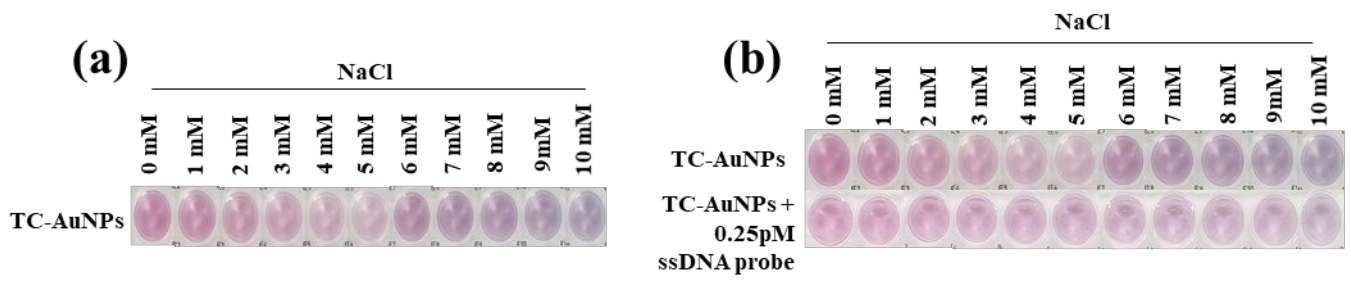

**Figure S2.** Aggregation pattern of TC-AuNPs at 0 sec. **(a)** With increasing NaCl concentrations, **(b)** in the presence of 0.25pM ssDNA probe.

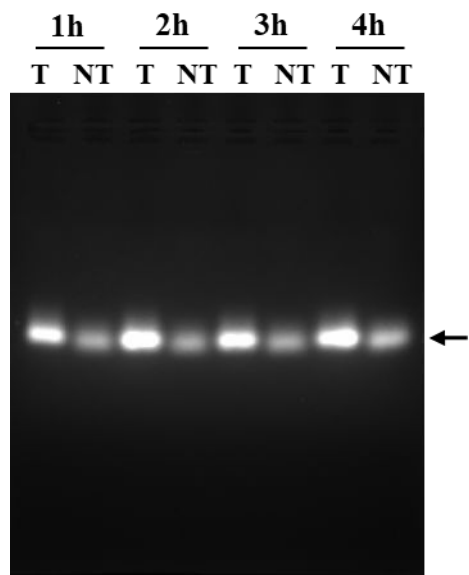

**Figure S3.** Agarose gel electrophoresis of hybridized DNA after indicated time intervals.

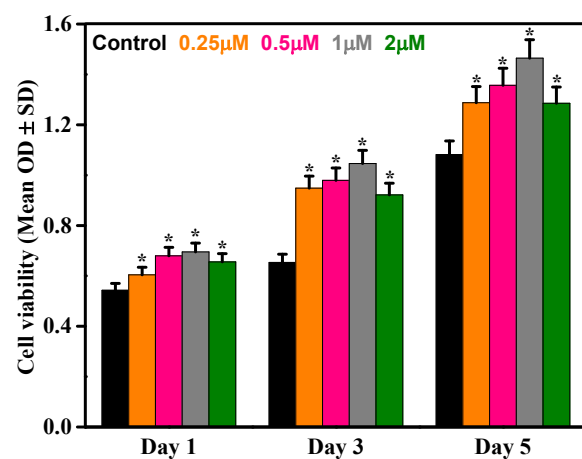

**Figure S4.** Cytotoxicity evaluation of hBMSCs in the presence of 0.25 μM, 0.5 μM, 1 μM, and 2 μM of TC-AuNPs after indicated time intervals. Data are mean ± SD of triplicated experiments, statistical significance at  $*p < 0.05$ .
